# Supplementary material for: Osteosynthesis-associated infection of the lower limbs by multidrug-resistant and extensively drug-resistant Gram-negative bacteria: a multicentre cohort study
Source: Copernicus journal article supplement (doi:10.5194/jbji-7-279-2022), 2022-12-21
Supplement: Supplementary file 1 [file jbji-7-279-2022-supplement.pdf]

Supplement of J. Bone Joint Infect., 7, 279–288, 2022  
<https://doi.org/10.5194/jbji-7-279-2022-supplement>  
© Author(s) 2022. CC BY 4.0 License.

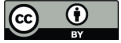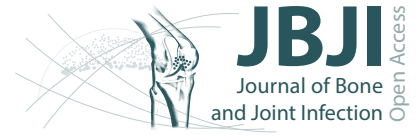

*Supplement of*

## **Osteosynthesis-associated infection of the lower limbs by multidrug-resistant and extensively drug-resistant Gram-negative bacteria: a multicentre cohort study**

**Efthymia Giannitsioti et al.**

*Correspondence to:* Efthymia Giannitsioti ([gianiemi@hotmail.com](mailto:gianiemi@hotmail.com))

The copyright of individual parts of the supplement might differ from the article licence.

1 **Supplementary table S1. Clinical characteristics and antimicrobial**  
 2 **treatment in patients with OAI according to the type of surgery**

3

| Variables, n (%)                                     | Implant removal<br>n= 27 | Implant retention<br>with debridement,<br>n= 30 | All<br>procedures<br>n=57 | p            |
|------------------------------------------------------|--------------------------|-------------------------------------------------|---------------------------|--------------|
| Age (+/-SD) years                                    | 56.59 (21.05)            | 56.03(22.54)                                    | 56.30(21.65)              | 0.923        |
| Male                                                 | 10(37)                   | 13(43.3)                                        | 23(40.4)                  | 0.788        |
| Female                                               | 17(63)                   | 17(56.7)                                        | 34(59.6)                  |              |
| Comorbidities <sup>1</sup>                           | 8(29.6)                  | 9(30)                                           | 17(29.8)                  | >0.999       |
| History of trauma                                    | 24(88.9)                 | 26(86.7)                                        | 50(87.7)                  | >0.999       |
| Prior surgery for implant<br>infection               | 9(33.3)                  | 10(33.3)                                        | 19(33.3)                  | >0.999       |
| Early                                                | 8(29.6)                  | 20(66.7)                                        | 28(49.1)                  | <b>0.008</b> |
| Late infection <sup>2</sup>                          | 19(70.4)                 | 10(33.3)                                        | 29(50.9)                  |              |
| Fever                                                | 5(18.5)                  | 6(20)                                           | 11(19.3)                  | >0.999       |
| Soft tissue infection                                | 16(59.3)                 | 18(60)                                          | 34(59.6)                  | >0.999       |
| Sinus tract                                          | 9(33.3)                  | 15(50)                                          | 24(42.1)                  | 0.284        |
| Location                                             |                          |                                                 |                           |              |
| -hip, femur                                          | 13(48.1)                 | 15(50)                                          | 28(49.9)                  | >0.999       |
| -knee, tibia, foot                                   | 14(51.9)                 | 15(50)                                          | 29(50.1)                  |              |
| MDR GNB                                              | 21(77.8)                 | 23(76.7)                                        | 44(77.2)                  | >0.999       |
| XDR GNB <sup>3</sup>                                 | 6(22.2)                  | 7(23.3)                                         | 13(22.8)                  |              |
| <i>Pseudomonas aeruginosa</i>                        | 6(22.2)                  | 8(26.7)                                         | 14(24.6)                  | 0.765        |
| Use of fluoroquinolones                              | 5(18.5)                  | 3(10)                                           | 8(14)                     | 0.457        |
| Use of carbapenems                                   | 17(63)                   | 15(50)                                          | 32(56.1)                  | 0.425        |
| Use of colistin                                      | 5(18.5)                  | 6(20)                                           | 11(19.3)                  | >0.999       |
| Combined antibiotics                                 | 15(55.6)                 | 22(73.3)                                        | 37(64.9)                  | 0.178        |
| Antibiotics > 42 days                                | 13(48.1)                 | 20(66.7)                                        | 33(57.9)                  | 0.187        |
| More than one surgical<br>procedure during follow-up | 6(22.2)                  | 8 (26.7)                                        | 14(24.6)                  | 0.765        |
| Remission of infection                               | 16(59.2)                 | 13(43.3)                                        | 29(50.9)                  | 0.292        |

4

5 Footnotes

6 <sup>1</sup> Comorbidities: Diabetes mellitus, Chronic renal failure, Cardiovascular Diseases  
 7 (heart disease, stroke), COPD (Chronic Obstructive Pulmonary Disease), Malignancy,  
 8 Rheumatologic diseases

9 <sup>2</sup> infection onset within the first 4 weeks (early) or beyond 4 weeks (late)

10 following index osteosynthesis of any bone of the lower extremities.

11 <sup>3</sup> MDR = Multi Drug Resistant, XDR= Extensively Drug Resistant, GNB=Gram Negative  
 12 Bacteria

13 <sup>4</sup> Remission of infection: no sign of infection during a 24-month follow up
